# Supplementary material for: Prevalence, Cost, and Variation in Cost of Pediatric Hospitalizations in Ontario, Canada
Source: PubMed Central journal article supplement (PMC8829658; doi:10.1001/jamanetworkopen.2021.47447), 2022-02-09
Supplement: jamanetwopen-e2147447-s001.pdf [file jamanetwopen-e2147447-s001.pdf]

## Supplementary Online Content

Gill PJ, Thavam T, Anwar MR, et al. Prevalence, cost, and variation in cost of pediatric hospitalizations in Ontario, Canada. *JAMA Netw Open*. 2022;5(2):e2147447. doi:10.1001/jamanetworkopen.2021.47447

**eFigure.** Flow Diagram of Cohort Construction

**eTable 1.** Top 10 *ICD-10-CA* Most Responsible Diagnosis Codes That Led to Hospital Encounters for Each Nonspecific Pediatric Condition Identified in Children With Inpatient Encounters (From Table 2) in Ontario, 2014-2019

**eTable 2.** Variation in Cost per Encounter Across General Hospitals for the 25 Conditions With the Highest Cumulative Cost Among Children in Ontario, 2014-2019

**eTable 3.** Volume and Cost of Inpatient Encounters in Pediatric Hospitals and General Hospitals, 2014-2019

**eTable 4.** Prevalence and Cost of the 25 Most Costly and 25 Most Prevalent Conditions Among Children With Inpatient Encounters in Pediatric Hospitals in Ontario, 2014-2019

**eTable 5.** Prevalence and Cost for the 25 Most Costly and 25 Most Prevalent Conditions Among Children With Inpatient Encounters in General Hospitals in Ontario, 2014-2019

This supplementary material has been provided by the authors to give readers additional information about their work.

**eFigure 1.** Flow Diagram of Cohort Construction

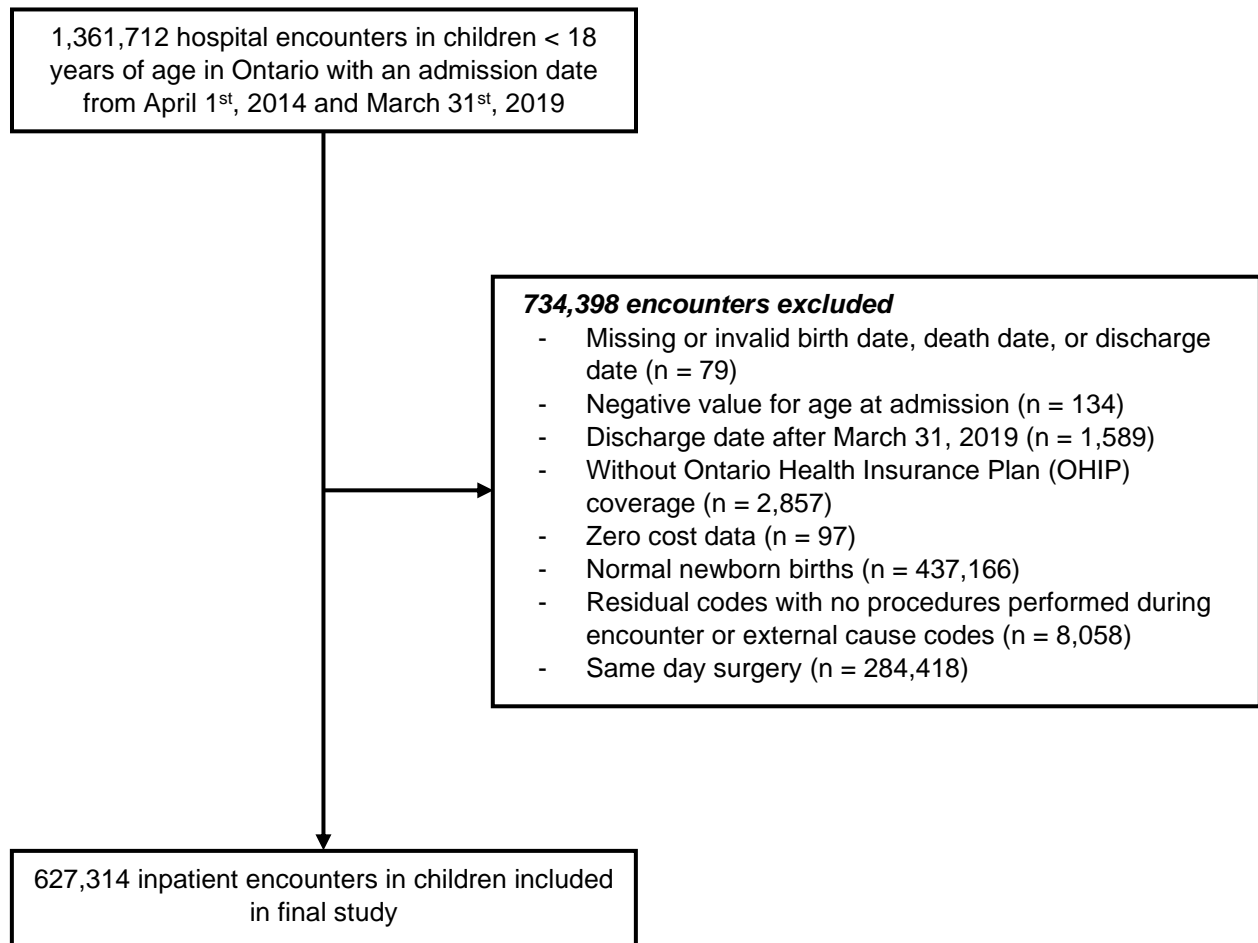

**eTable 1.** Top 10 *ICD-10-CA* Most Responsible Diagnosis Codes That Led to Hospital Encounters for Each Nonspecific Pediatric Condition Identified in Children With Inpatient Encounters (From Table 2) in Ontario, 2014-2019

| Condition                     | Total Number of Encounters | ICD-10-CA Diagnosis Code Descriptions <sup>a</sup>                                                            | No. (%) of Encounters <sup>b</sup> |
|-------------------------------|----------------------------|---------------------------------------------------------------------------------------------------------------|------------------------------------|
| Other perinatal conditions    | 42,674                     | Other heavy for gestational age infants                                                                       | 13,627 (31.9)                      |
|                               |                            | Post-term infant, not heavy for gestational age                                                               | 10,670 (25.0)                      |
|                               |                            | Exceptionally large baby                                                                                      | 3,660 (8.6)                        |
|                               |                            | Other cardiovascular disorders originating in the perinatal period                                            | 3,580 (8.4)                        |
|                               |                            | Condition originating in the perinatal period, unspecified                                                    | 870 (2.0)                          |
|                               |                            | Fetus and newborn affected by other malpresentation, malposition and disproportion during labour and delivery | 721 (1.7)                          |
|                               |                            | Fetus and newborn affected by other compression of umbilical cord                                             | 705 (1.7)                          |
|                               |                            | Apparent life threatening event of infant                                                                     | 628 (1.5)                          |
|                               |                            | Fetus and newborn affected by maternal use of drugs of addiction                                              | 589 (1.4)                          |
|                               |                            | Fetus and newborn affected by breech delivery and extraction                                                  | 520 (1.2)                          |
|                               |                            | <i>Other ICD-10-CA diagnosis codes</i>                                                                        | 7,104 (16.6)                       |
| Other congenital anomalies    | 3,077                      | Other specified congenital malformations of skin                                                              | 259 (8.4)                          |
|                               |                            | Congenital malformation syndromes predominantly affecting facial appearance                                   | 163 (5.3)                          |
|                               |                            | Unstable hip                                                                                                  | 151 (4.9)                          |
|                               |                            | Preauricular sinus and cyst                                                                                   | 136 (4.4)                          |
|                               |                            | Other specified congenital malformations                                                                      | 110 (3.6)                          |
|                               |                            | Other congenital malformations of lower limb(s), including pelvic girdle                                      | 101 (3.3)                          |
|                               |                            | Other reduction defects of lower limb(s)                                                                      | 86 (2.8)                           |
|                               |                            | Other congenital malformations of upper limb(s), including shoulder girdle                                    | 76 (2.5)                           |
|                               |                            | Congenital deformity of sternocleidomastoid muscle                                                            | 67 (2.2)                           |
|                               |                            | Other specified congenital musculoskeletal deformities                                                        | 66 (2.1)                           |
|                               |                            | <i>Other ICD-10-CA diagnosis codes</i>                                                                        | 1,862 (60.5)                       |
| Other mental health disorders | 3,168                      | Other symptoms and signs involving emotional state                                                            | 2,073 (65.4)                       |

| Condition                          | Total Number of Encounters | ICD-10-CA Diagnosis Code Descriptions <sup>a</sup>                       | No. (%) of Encounters <sup>b</sup> |
|------------------------------------|----------------------------|--------------------------------------------------------------------------|------------------------------------|
|                                    |                            | Other eating disorders                                                   | 309 (9.8)                          |
|                                    |                            | Eating disorder, unspecified                                             | 284 (9.0)                          |
|                                    |                            | Dissociative [conversion] disorder, unspecified                          | 199 (6.3)                          |
|                                    |                            | Gender identity disorder, unspecified                                    | 35 (1.1)                           |
|                                    |                            | Somatoform disorder, unspecified                                         | 31 (1.0)                           |
|                                    |                            | Somatization disorder                                                    | 29 (0.9)                           |
|                                    |                            | Other gender identity disorders                                          | 24 (0.8)                           |
|                                    |                            | Mental disorder, not otherwise specified                                 | 16 (0.5)                           |
|                                    |                            | Other somatoform disorders                                               | 16 (0.5)                           |
|                                    |                            | <i>Other ICD-10-CA diagnosis codes</i>                                   | 152 (4.8)                          |
| Screening for suspected conditions | 10,817                     | Observation for other suspected diseases and conditions                  | 9,981 (92.3)                       |
|                                    |                            | Other specified abnormal findings of blood chemistry                     | 172 (1.6)                          |
|                                    |                            | Observation for suspected disease or condition, unspecified              | 108 (1.0)                          |
|                                    |                            | Observation for other suspected cardiovascular diseases                  | 106 (1.0)                          |
|                                    |                            | Observation for suspected toxic effect from ingested substance           | 105 (1.0)                          |
|                                    |                            | Abnormal results of kidney function studies                              | 83 (0.8)                           |
|                                    |                            | Observation for suspected nervous system disorder                        | 68 (0.6)                           |
|                                    |                            | Abnormal results of liver function studies                               | 38 (0.4)                           |
|                                    |                            | Observation for suspected mental and behavioural disorders               | 33 (0.3)                           |
|                                    |                            | Special screening examination for other specified diseases and disorders | 15 (0.1)                           |
|                                    |                            | <i>Other ICD-10-CA diagnosis codes</i>                                   | 108 (1.0)                          |
| Other lower respiratory disease    | 3,533                      | Other specified respiratory disorders                                    | 1,626 (46.0)                       |
|                                    |                            | Unspecified acute lower respiratory infection                            | 829 (23.5)                         |
|                                    |                            | Other and unspecified abnormalities of breathing                         | 767 (21.7)                         |
|                                    |                            | Other disorders of lung                                                  | 77 (2.2)                           |
|                                    |                            | Haemoptysis                                                              | 72 (2.0)                           |
|                                    |                            | Pulmonary oedema                                                         | 26 (0.7)                           |
|                                    |                            | Respiratory disorder, unspecified                                        | 24 (0.7)                           |

| Condition                               | Total Number of Encounters | ICD-10-CA Diagnosis Code Descriptions <sup>a</sup>                  | No. (%) of Encounters <sup>b</sup> |
|-----------------------------------------|----------------------------|---------------------------------------------------------------------|------------------------------------|
|                                         |                            | Interstitial pulmonary disease, unspecified                         | 21 (0.6)                           |
|                                         |                            | Haemorrhage from other sites in respiratory passages                | 20 (0.6)                           |
|                                         |                            | Periodic breathing                                                  | 17 (0.5)                           |
|                                         |                            | <i>Other ICD-10-CA diagnosis codes</i>                              | 54 (1.5)                           |
| Other aftercare                         | 4,738                      | Convalescence following surgery                                     | 3,244 (68.5)                       |
|                                         |                            | Convalescence following other treatment                             | 330 (7.0)                          |
|                                         |                            | Other specified medical care NEC                                    | 236 (5.0)                          |
|                                         |                            | Preparatory care for subsequent treatment, not elsewhere classified | 181 (3.8)                          |
|                                         |                            | Palliative care                                                     | 132 (2.8)                          |
|                                         |                            | Convalescence following treatment of fracture                       | 98 (2.1)                           |
|                                         |                            | Follow-up examination after surgery for other conditions            | 76 (1.6)                           |
|                                         |                            | Blood transfusion (without reported diagnosis)                      | 63 (1.3)                           |
|                                         |                            | Pain management planning                                            | 58 (1.2)                           |
|                                         |                            | Other specified surgical follow-up care                             | 53 (1.1)                           |
|                                         |                            | <i>Other ICD-10-CA diagnosis codes</i>                              | 267 (5.6)                          |
| Other convulsions                       | 2,954                      | Other and unspecified convulsions                                   | 2,138 (72.4)                       |
|                                         |                            | Seizure disorder, so described                                      | 816 (27.6)                         |
| Respiratory problems after birth, other | 2,882                      | Other specified respiratory conditions of newborn                   | 2,315 (80.3)                       |
|                                         |                            | Respiratory condition of newborn, unspecified                       | 567 (19.7)                         |

Abbreviations: ICD-10-CA, International Statistical Classification of Diseases and Related Health Problems, Tenth Revision Canada; NEC, not elsewhere classified.

<sup>a</sup> Indicates the descriptions for the top 10 ICD-10-CA diagnosis codes that led to hospital encounters for each non-specific pediatric condition. The remainder ICD-10-CA codes that led to encounters for the corresponding condition was grouped under '*Other ICD-10-CA diagnosis codes*' for that condition.

<sup>b</sup> The data reflects the number and percentage of encounters for each ICD-10-CA diagnosis code within the corresponding condition.

**eTable 2.** Variation in Cost per Encounter Across General Hospitals for the 25 Conditions With the Highest Cumulative Cost Among Children in Ontario, 2014-2019

| Condition                                  | Number of Hospitals Included <sup>a</sup> | ICC <sup>b</sup> | Number of Outlier Hospitals <sup>b</sup> |           |                    |
|--------------------------------------------|-------------------------------------------|------------------|------------------------------------------|-----------|--------------------|
|                                            |                                           |                  | Low Cost                                 | High Cost | Total <sup>c</sup> |
| <b>Newborn condition</b>                   |                                           |                  |                                          |           |                    |
| Intrauterine hypoxia and birth asphyxia    | 17                                        | 0.06             | 1                                        | 3         | 4                  |
| Other perinatal conditions                 | 73                                        | 0.06             | 2                                        | 12        | 14                 |
| Surfactant deficiency disorder             | 31                                        | 0.12             | 5                                        | 4         | 9                  |
| Low birth weight                           | 62                                        | 0.13             | 20                                       | 4         | 24                 |
| Preterm newborn                            | 60                                        | 0.10             | 17                                       | 4         | 21                 |
| Transient tachypnea of newborn             | 57                                        | 0.09             | 16                                       | 4         | 20                 |
| Respiratory distress of newborn            | 51                                        | 0.07             | 9                                        | 9         | 18                 |
| Drug withdrawal syndrome in newborn        | 30                                        | 0.03             | 2                                        | 5         | 6                  |
| Neonatal hyperbilirubinemia                | 68                                        | 0.02             | 5                                        | 3         | 8                  |
| Extreme immaturity of newborn <sup>d</sup> | -                                         | -                | -                                        | -         | -                  |
| <b>Mental health condition</b>             |                                           |                  |                                          |           |                    |
| Other mental health disorders              | 25                                        | 0.33             | 7                                        | 8         | 15                 |
| Anxiety disorders                          | 24                                        | 0.22             | 6                                        | 1         | 7                  |
| Major depressive disorder                  | 29                                        | 0.05             | 3                                        | 3         | 6                  |
| Adjustment disorders                       | 23                                        | 0.06             | 2                                        | 5         | 7                  |
| Anorexia nervosa <sup>d</sup>              | -                                         | -                | -                                        | -         | -                  |
| <b>Infectious condition</b>                |                                           |                  |                                          |           |                    |
| Septicemia                                 | 18                                        | 0.00             | 1                                        | 2         | 3                  |
| Sepsis of newborn                          | 27                                        | 0.03             | 2                                        | 2         | 4                  |
| Neutropenia <sup>d</sup>                   | -                                         | -                | -                                        | -         | -                  |
| Pneumonia                                  | 47                                        | 0.03             | 2                                        | 5         | 7                  |
| Infectious Gastroenteritis                 | 41                                        | 0.00             | 1                                        | 0         | 1                  |
| Urinary tract infections                   | 40                                        | 0.00             | 0                                        | 0         | 0                  |
| <b>Respiratory condition</b>               |                                           |                  |                                          |           |                    |
| Bronchiolitis                              | 43                                        | 0.01             | 1                                        | 2         | 3                  |
| Asthma                                     | 41                                        | 0.02             | 0                                        | 3         | 3                  |
| <b>Cancer</b>                              |                                           |                  |                                          |           |                    |
| Chemotherapy                               | 23                                        | 0.13             | 5                                        | 10        | 15                 |
| Acute lymphoid leukemia <sup>d</sup>       | -                                         | -                | -                                        | -         | -                  |

Abbreviations: ICC, Intraclass correlation coefficient.

<sup>a</sup> For each condition, it indicates the number of general hospitals in Ontario with > 25 encounters for the corresponding condition during the study. Variation in cost analysis was performed using encounter data from these hospitals only.

<sup>b</sup> The ICCs and number of outlier hospitals were calculated using costs that were adjusted for patient's age, sex, number of complex chronic conditions present, material deprivation, and rural-urban classification.

<sup>c</sup> Indicates the total number of unique outlier general hospitals for each condition. For some conditions, the total number will not equal to the sum of low cost and high cost outlier general hospitals, as some of these hospitals were reported in both low and high cost outlier hospital.

<sup>d</sup> Variation in cost analysis was not performed for extreme immaturity of newborn, anorexia nervosa, neutropenia, and acute lymphoid leukemia, because there were less than 10 general hospitals with > 25 encounters for each of the condition to conduct this analysis.

**eTable 3.** Volume and Cost of Inpatient Encounters in Pediatric Hospitals and General Hospitals, 2014-2019

|                                                                                       | <b>Pediatric Hospitals</b> | <b>General Hospitals</b> |
|---------------------------------------------------------------------------------------|----------------------------|--------------------------|
| <b>Number of encounters, No.</b>                                                      | 219,311                    | 408,003                  |
| <b>Percent of encounters from all encounters in children, %</b>                       | 35.0                       | 65.0                     |
| <b>Cost of encounters, \$USD<sup>a</sup></b>                                          | 1,851,916,589              | 1,443,735,382            |
| <b>Percent of cost of encounters from the total cost of encounters in children, %</b> | 56.2                       | 43.8                     |
| <b>Annual volume of encounters, median (IQR)</b>                                      | 4,117.1 (1,924.9, 7,704.4) | 53.6 (4.0, 757.2)        |

Abbreviations: USD, US dollars; IQR, interquartile range.

<sup>a</sup> Costs adjusted for inflation to 2018 US dollars (mean 2018 exchange rate: \$0.77 US dollars = \$1.00 Canadian dollar).

**eTable 4.** Prevalence and Cost of the 25 Most Costly and 25 Most Prevalent Conditions Among Children With Inpatient Encounters in Pediatric Hospitals in Ontario, 2014-2019

| Condition                                            | Type             | Rank Based on |                                   | Number of Encounters |                         | Cost (\$ USD) <sup>d</sup> |                            |
|------------------------------------------------------|------------------|---------------|-----------------------------------|----------------------|-------------------------|----------------------------|----------------------------|
|                                                      |                  | Total Cost    | Number of Encounters <sup>a</sup> | Total <sup>b</sup>   | Prevalence <sup>c</sup> | Total                      | Per Encounter Median (IQR) |
| Low birth weight                                     | Medical          | 1             | 1                                 | 14,962               | 68.2                    | 348,173,239                | 6,435 (1,928-20,595)       |
| Chemotherapy                                         | Medical          | 2             | 2                                 | 6,222                | 28.4                    | 34,211,554                 | 4,384 (3,754-4,544)        |
| Surfactant deficiency disorder                       | Medical          | 3             | 38                                | 1,195                | 5.4                     | 33,819,387                 | 11,875 (6,202-27,321)      |
| Pneumonia                                            | Medical          | 4             | 4                                 | 5,175                | 23.6                    | 32,831,102                 | 3,838 (2,781-5,562)        |
| Preterm newborn                                      | Medical          | 5             | 5                                 | 4,737                | 21.6                    | 25,080,526                 | 1,312 (1,252-5,897)        |
| Acute lymphoid leukemia                              | Medical          | 6             | 61                                | 835                  | 3.8                     | 23,196,530                 | 19,114 (13,943-30,242)     |
| Other congenital anomalies                           | Surgical         | 7             | 26                                | 1,889                | 8.6                     | 22,835,579                 | 3,750 (2,377-6,232)        |
| Major depressive disorder                            | Medical          | 8             | 8                                 | 3,669                | 16.7                    | 22,155,173                 | 5,779 (5,341-6,735)        |
| Anorexia nervosa                                     | Medical          | 9             | 37                                | 1,227                | 5.6                     | 22,108,487                 | 18,399 (16,329-18,752)     |
| Bronchiolitis                                        | Medical          | 10            | 6                                 | 4,497                | 20.5                    | 21,750,457                 | 2,626 (2,491-3,972)        |
| Necrotizing enterocolitis                            | Medical/Surgical | 11            | 148                               | 324                  | 1.5                     | 21,515,167                 | 24,992 (14,961-78,015)     |
| Scoliosis                                            | Surgical         | 12            | 45                                | 1,020                | 4.7                     | 20,118,088                 | 18,884 (12,943-19,834)     |
| Complications of surgical procedures or medical care | Medical/Surgical | 13            | 14                                | 2,575                | 11.7                    | 18,346,151                 | 2,686 (1,802-5,790)        |
| Respiratory failure                                  | Medical          | 14            | 98                                | 527                  | 2.4                     | 17,777,414                 | 18,452 (7,403-45,473)      |
| Tetralogy of fallot                                  | Medical/Surgical | 15            | 97                                | 536                  | 2.4                     | 17,518,377                 | 18,242 (4,607-30,921)      |
| Transposition of great vessels                       | Medical/Surgical | 16            | 112                               | 444                  | 2.0                     | 16,377,101                 | 21,649 (3,636-45,820)      |
| Other perinatal conditions                           | Medical          | 17            | 3                                 | 6,066                | 27.7                    | 16,088,503                 | 1,065 (1,030-1,326)        |
| Gastroschisis & Exomphalos                           | Surgical         | 18            | 156                               | 300                  | 1.4                     | 15,594,173                 | 24,370 (1,332-68,466)      |
| Congenital tracheoesophageal disorders               | Surgical         | 19            | 190                               | 215                  | 1.0                     | 15,406,927                 | 26,902 (3,786-67,707)      |
| Hypoplastic left heart syndrome                      | Medical/Surgical | 20            | 182                               | 234                  | 1.1                     | 15,256,568                 | 15,340 (1,758-54,583)      |



| Condition                                      | Type             | Rank Based on |                                   | Number of Encounters |                         | Cost (\$ USD) <sup>d</sup> |                            |
|------------------------------------------------|------------------|---------------|-----------------------------------|----------------------|-------------------------|----------------------------|----------------------------|
|                                                |                  | Total Cost    | Number of Encounters <sup>a</sup> | Total <sup>b</sup>   | Prevalence <sup>c</sup> | Total                      | Per Encounter Median (IQR) |
| Intrauterine hypoxia and birth asphyxia        | Medical          | 21            | 46                                | 989                  | 4.5                     | 15,250,690                 | 10,189 (4,070-16,635)      |
| Neutropenia                                    | Medical          | 22            | 22                                | 2,055                | 9.4                     | 14,438,459                 | 4,292 (3,737-7,389)        |
| Septicemia                                     | Medical          | 23            | 60                                | 840                  | 3.8                     | 13,376,766                 | 7,948 (4,615-15,634)       |
| Cystic fibrosis                                | Medical          | 24            | 71                                | 755                  | 3.4                     | 13,143,030                 | 14,365 (12,436-16,173)     |
| Extreme immaturity of newborn                  | Medical          | 25            | 231                               | 159                  | 0.7                     | 12,852,505                 | 63,389 (28,916-101,987)    |
| Fracture of lower limb                         | Surgical         | 28            | 17                                | 2,328                | 10.6                    | 11,886,094                 | 3,953 (3,334-6,744)        |
| Seizures with and without intractable epilepsy | Medical          | 29            | 12                                | 2,747                | 12.5                    | 11,786,414                 | 1,905 (1,827-3,184)        |
| Acute appendicitis with peritonitis            | Surgical         | 30            | 23                                | 2,033                | 9.3                     | 11,115,823                 | 4,045 (3,453-5,676)        |
| Adjustment disorders                           | Medical          | 36            | 25                                | 1,926                | 8.8                     | 10,203,070                 | 5,067 (4,433-6,314)        |
| Asthma                                         | Medical          | 39            | 9                                 | 3,565                | 16.3                    | 8,971,143                  | 1,739 (1,698-2,448)        |
| Urinary tract infections                       | Medical          | 41            | 19                                | 2,142                | 9.8                     | 8,854,935                  | 3,170 (2,844-3,916)        |
| Acute appendicitis without peritonitis         | Surgical         | 44            | 10                                | 2,949                | 13.4                    | 8,352,567                  | 2,655 (2,519-2,832)        |
| Infectious Gastroenteritis                     | Medical          | 46            | 13                                | 2,723                | 12.4                    | 8,286,627                  | 1,862 (1,721-2,896)        |
| Supracondylar fracture of humerus              | Surgical         | 49            | 11                                | 2,861                | 13.0                    | 8,201,937                  | 2,943 (2,829-2,973)        |
| Acute upper respiratory infection              | Medical          | 51            | 21                                | 2,088                | 9.5                     | 7,806,877                  | 2,092 (1,971-2,582)        |
| Neonatal hyperbilirubinemia                    | Medical          | 52            | 7                                 | 4,449                | 20.3                    | 7,798,536                  | 1,447 (1,064-1,514)        |
| Transient tachypnea of newborn                 | Medical          | 55            | 20                                | 2,122                | 9.7                     | 7,364,327                  | 1,946 (1,522-3,949)        |
| Sleep apnea                                    | Surgical         | 57            | 24                                | 1,932                | 8.8                     | 7,116,573                  | 1,842 (1,828-1,928)        |
| Other aftercare                                | Medical/Surgical | 63            | 15                                | 2,398                | 10.9                    | 6,840,110                  | 1,275 (1,186-2,759)        |
| Fracture of upper limb                         | Surgical         | 64            | 18                                | 2,296                | 10.5                    | 6,582,377                  | 2,930 (2,281-3,034)        |
| Screening for suspected conditions             | Medical          | 100           | 16                                | 2,346                | 10.7                    | 4,031,916                  | 1,233 (1,036-1,378)        |

Abbreviations: USD, US dollars; IQR, interquartile range.

<sup>a</sup> Also known as prevalence rank in this study.

<sup>b</sup> Total number of encounters for the condition over the study period.

<sup>c</sup> Condition-specific prevalence calculated per 1000 encounters.

<sup>d</sup> Costs adjusted for inflation to 2018 US dollars (mean 2018 exchange rate: \$0.77 US dollars = \$1.00 Canadian dollar).

**eTable 5.** Prevalence and Cost for the 25 Most Costly and 25 Most Prevalent Conditions Among Children With Inpatient Encounters in General Hospitals in Ontario, 2014-2019

| Condition                              | Type             | Rank Based on |                                   | Number of Encounters |                         | Cost (\$ USD) <sup>d</sup> |                            |
|----------------------------------------|------------------|---------------|-----------------------------------|----------------------|-------------------------|----------------------------|----------------------------|
|                                        |                  | Total Cost    | Number of Encounters <sup>a</sup> | Total <sup>b</sup>   | Prevalence <sup>c</sup> | Total                      | Per Encounter Median (IQR) |
| Low birth weight                       | Medical          | 1             | 1                                 | 39,138               | 95.9                    | 328,119,142                | 2,243 (1,227-11,834)       |
| Preterm newborn                        | Medical          | 2             | 4                                 | 19,084               | 46.8                    | 112,296,860                | 2,706 (1,255-6,140)        |
| Major depressive disorder              | Medical          | 3             | 9                                 | 9,306                | 22.8                    | 56,148,803                 | 5,849 (5,306-6,735)        |
| Other perinatal conditions             | Medical          | 4             | 2                                 | 36,608               | 89.7                    | 49,703,171                 | 1,036 (1,026-1,236)        |
| Neonatal hyperbilirubinemia            | Medical          | 5             | 3                                 | 25,599               | 62.7                    | 38,872,091                 | 1,447 (1,064-1,500)        |
| Pneumonia                              | Medical          | 6             | 6                                 | 11,968               | 29.3                    | 38,735,436                 | 2,870 (2,696-3,168)        |
| Drug withdrawal syndrome in newborn    | Medical          | 7             | 27                                | 2,939                | 7.2                     | 33,321,467                 | 9,473 (8,793-13,395)       |
| Transient tachypnea of newborn         | Medical          | 8             | 5                                 | 12,165               | 29.8                    | 32,934,418                 | 1,541 (1,428-3,186)        |
| Bronchiolitis                          | Medical          | 9             | 7                                 | 11,453               | 28.1                    | 32,830,804                 | 2,602 (2,375-2,700)        |
| Adjustment disorders                   | Medical          | 10            | 17                                | 5,695                | 14.0                    | 30,685,087                 | 5,113 (4,675-6,314)        |
| Anxiety disorders                      | Medical          | 11            | 24                                | 3,285                | 8.1                     | 20,050,617                 | 6,448 (5,394-7,030)        |
| Acute appendicitis without peritonitis | Surgical         | 12            | 13                                | 7,029                | 17.2                    | 19,550,172                 | 2,655 (2,519-2,832)        |
| Asthma                                 | Medical          | 13            | 8                                 | 9,884                | 24.2                    | 19,483,048                 | 1,723 (1,623-1,982)        |
| Infectious Gastroenteritis             | Medical          | 14            | 10                                | 8,650                | 21.2                    | 17,304,738                 | 1,734 (1,706-1,889)        |
| Urinary tract infections               | Medical          | 15            | 20                                | 4,946                | 12.1                    | 16,790,111                 | 3,112 (2,830-3,465)        |
| Respiratory distress of newborn        | Medical          | 16            | 15                                | 6,339                | 15.5                    | 16,660,328                 | 1,541 (1,428-2,651)        |
| Surfactant deficiency disorder         | Medical          | 17            | 44                                | 1,820                | 4.5                     | 16,204,139                 | 4,050 (1,561-10,120)       |
| Feeding difficulties                   | Medical/Surgical | 18            | 19                                | 5,384                | 13.2                    | 15,547,809                 | 1,354 (1,030-2,264)        |
| Newborn respiratory failure            | Medical          | 19            | 18                                | 5,664                | 13.9                    | 13,754,596                 | 1,269 (1,123-2,335)        |
| Hypertrophy of tonsils and adenoids    | Surgical         | 20            | 12                                | 7,070                | 17.3                    | 13,456,130                 | 1,842 (1,828-1,907)        |
| Neonatal hypoglycemia                  | Medical          | 21            | 14                                | 6,784                | 16.6                    | 13,110,005                 | 1,078 (1,030-2,134)        |

| Condition                             | Type     | Rank Based on |                                   | Number of Encounters |                         | Cost (\$ USD) <sup>d</sup> |                            |
|---------------------------------------|----------|---------------|-----------------------------------|----------------------|-------------------------|----------------------------|----------------------------|
|                                       |          | Total Cost    | Number of Encounters <sup>a</sup> | Total <sup>b</sup>   | Prevalence <sup>c</sup> | Total                      | Per Encounter Median (IQR) |
| Sepsis of newborn                     | Medical  | 22            | 38                                | 2,257                | 5.5                     | 12,850,840                 | 4,635 (2,933-6,330)        |
| Schizophrenia and psychotic disorders | Medical  | 23            | 68                                | 1,023                | 2.5                     | 11,347,210                 | 10,769 (9,374-11,384)      |
| Acute appendicitis with peritonitis   | Surgical | 24            | 31                                | 2,367                | 5.8                     | 11,055,001                 | 4,007 (3,923-4,443)        |
| Viral infection                       | Medical  | 25            | 21                                | 4,844                | 11.9                    | 10,510,770                 | 1,898 (1,826-2,063)        |
| Screening for suspected conditions    | Medical  | 26            | 11                                | 8,471                | 20.8                    | 10,412,338                 | 1,036 (1,026-1,218)        |
| Infant of diabetic mother             | Medical  | 29            | 16                                | 5,884                | 14.4                    | 9,674,910                  | 1,065 (1,030-1,236)        |
| Sleep apnea                           | Surgical | 31            | 22                                | 4,426                | 10.8                    | 8,381,863                  | 1,842 (1,828-1,907)        |
| ABO Hemolytic disease                 | Medical  | 37            | 25                                | 3,267                | 8.0                     | 6,982,068                  | 1,858 (1,682-2,190)        |
| Tongue tie                            | Surgical | 52            | 23                                | 4,354                | 10.7                    | 4,980,370                  | 1,036 (1,026-1,078)        |

Abbreviations: USD, US dollars; IQR, interquartile range; ABO, ABO blood group system.

<sup>a</sup> Also known as prevalence rank in this study.

<sup>b</sup> Total number of encounters for the condition over the study period.

<sup>c</sup> Condition-specific prevalence calculated per 1000 encounters.

<sup>d</sup> Costs adjusted for inflation to 2018 US dollars (mean 2018 exchange rate: \$0.77 US dollars = \$1.00 Canadian dollar).
